# Supplementary material for: C lostridium difficile surface proteins are anchored to the cell wall using CWB2 motifs that recognise the anionic polymer PSII
Source: PubMed Central journal article supplement (PMC4973711; doi:10.1111/mmi.12958), 2015-03-06
Supplement: MMI-96-596-s001.pdf [file MMI-96-596-s001.pdf]

# ***Clostridium difficile* surface proteins are anchored to the cell wall using CWB2 motifs that recognise the anionic polymer PSII**

Stephanie E. Willing, Thomas Candela, Helen Alexandra Shaw, Zoe Seager, Stephane Mesnage, Robert P. Fagan and Neil F. Fairweather\*

## **SUPPLEMENTARY INFORMATION**

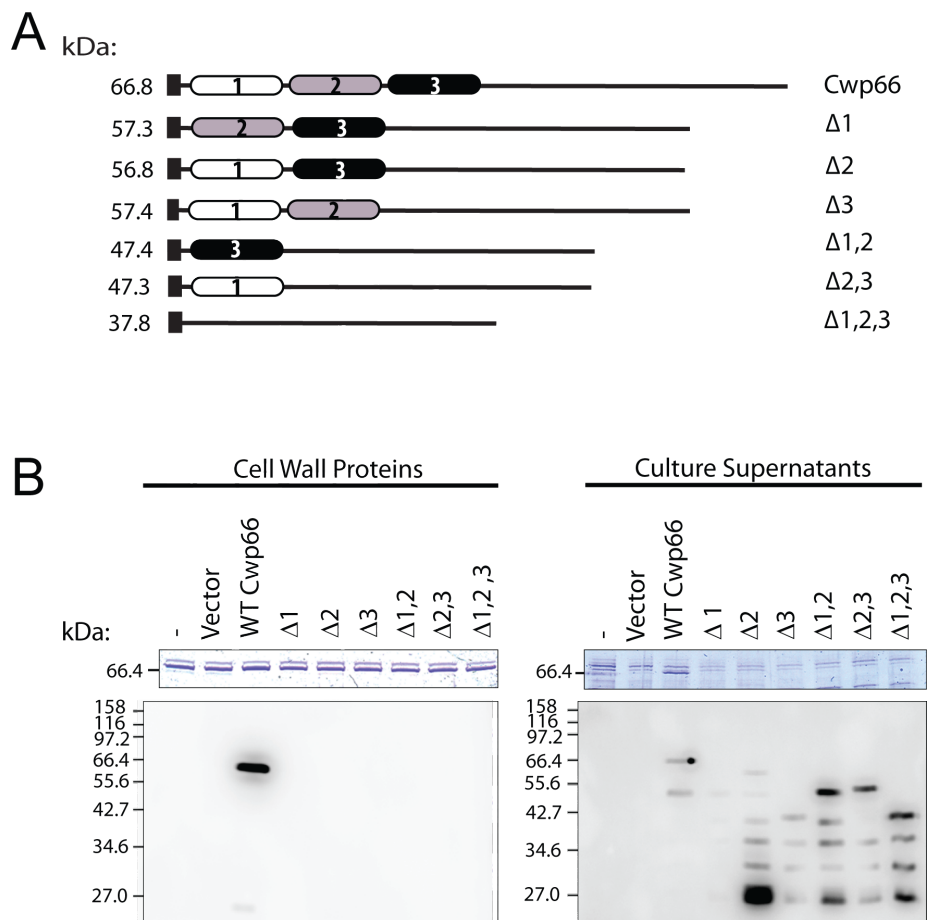

**Fig. S1. Deletion of the CWB2 repeats in Cwp66 prevents cell wall attachment in *C. difficile*.** **A.** Deletion derivatives of Cwp66 constructed. **B.** Cell wall extracts and culture supernatants from *C. difficile* *cwp66::erm* containing plasmids expressing the deletion derivatives of Cwp66 visualised by Coomassie blue staining (top) and western blotting using anti-Cwp66 antibody (bottom).

1. HMW 1
2. HMW 2
3. HMW 3
4. Cwp2 1
5. Cwp2 2
6. Cwp2 3
7. Cwp66 1
8. Cwp66 2
9. Cwp66 3
10. Cwp84 1
11. Cwp84 2
12. Cwp84 3
13. Cwp5 1
14. Cwp5 2
15. Cwp5 3
16. Cwp6 1
17. Cwp6 2
18. Cwp6 3
19. Cwp7 1
20. Cwp7 2
21. Cwp7 3
22. Cwp8 1
23. Cwp8 2
24. Cwp8 3
25. Cwp9 1
26. Cwp9 2
27. Cwp9 3
28. Cwp10 1
29. Cwp10 2
30. Cwp10 3
31. Cwp11 1
32. Cwp11 2
33. Cwp11 3
34. Cwp12 1
35. Cwp12 2
36. Cwp12 3
37. Cwp13 1
38. Cwp13 2
39. Cwp13 3
40. Cwp14 1
41. Cwp14 2
42. Cwp14 3
43. CwpV 1
44. CwpV 2
45. CwpV 3
46. Cwp16 1
47. Cwp16 2
48. Cwp16 3
49. Cwp17 1
50. Cwp17 2
51. Cwp17 3
52. Cwp18 1
53. Cwp18 2
54. Cwp18 3
55. Cwp19 1
56. Cwp19 2
57. Cwp19 3
58. Cwp20 1
59. Cwp20 2
60. Cwp20 3
61. Cwp21 1
62. Cwp21 2
63. Cwp21 3
64. Cwp22 1
65. Cwp22 2
66. Cwp22 3
67. Cwp23 1
68. Cwp23 2
69. Cwp23 3
70. Cwp24 1
71. Cwp24 2
72. Cwp24 3
73. Cwp25 1
74. Cwp25 2
75. Cwp25 3
76. Cwp26 1
77. Cwp26 2
78. Cwp26 3
79. Cwp27 1
80. Cwp27 2
81. Cwp27 3
82. Cwp28 1
83. Cwp28 2
84. Cwp28 3
85. Cwp29 1
86. Cwp29 2
87. Cwp29 3

**Fig. S2. Alignment of CWB2 motifs from *C. difficile*.** The 87 CWB2 motifs from the 29 CWPs from *C. difficile* 630 were aligned using ClustalW and displayed using Geneious software. Highly conserved residues are shaded based on the Blosum 62 matrix; **100%** similar, **80-100%** similar, **60-80%** similar and less than 60% similar. The motifs are numbered according to their location within their parent protein from N → C terminus.

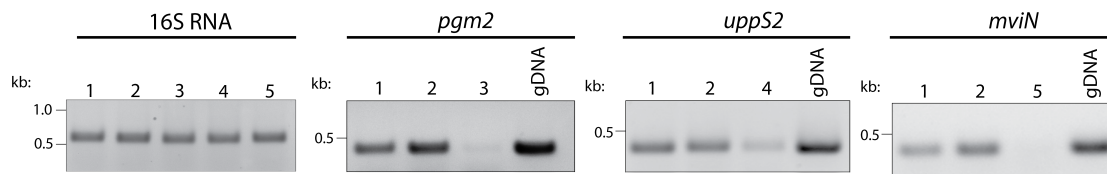

**Fig. S3 Semi-quantitative RT-PCR of gene knock-down by expression of anti-sense RNA.** Overnight cultures were diluted to an  $OD_{600}$  of 0.025 in BHIS broth. With the exception of 630, all cultures were supplemented with 500 ng/ml anhydrotetracycline. Cultures were grown to an  $OD_{600}$  of approximately 0.3 and cDNA prepared by reverse transcription of 1  $\mu$ g of RNA. mRNA levels were then determined by semi-quantitative PCR. The strains are indicated as follows: 1 – 630; 2 – vector control, 3 – pSEW036 (*pgm2*); 4 - pSEW037 – (*uppS2*); 5 – pSEW038 (*mviN*). 25 cycles of PCR were used for amplification of 16S RNA, 35 cycles for amplification of *pgm2*, 32 cycles for amplification of *uppS2* and 28 cycles for amplification of *mviN*.

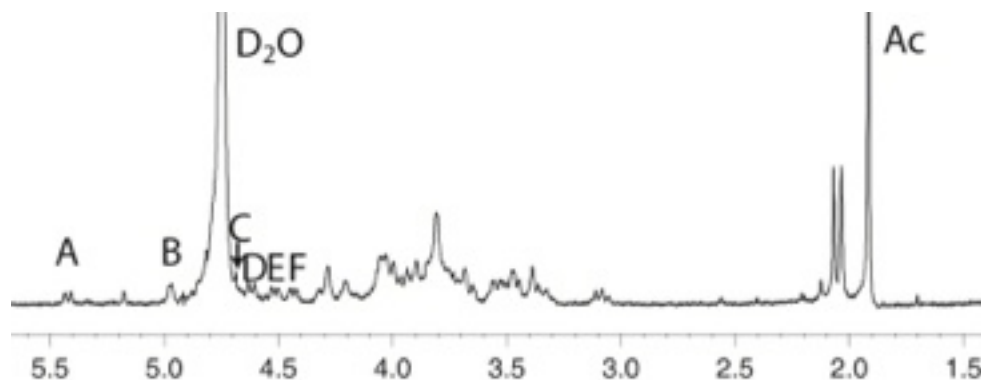

**Fig. S4.** <sup>1</sup>H NMR spectrum of the PS fraction purified from PG-PS. The <sup>1</sup>H NMR spectrum profile is similar to that of PSII (Ganeshapillai *et al* 2008). No other singlet, except the singlet between 1.9 and 2 which corresponds to acid acetic (Ac), was detected. The six anomeric resonances (designated A-F) and the two singlet resonances between 2.0 and 2.1 ppm were identified by Ganeshapillai *et al* 2008 as belonging to two D-GalpNAc units.

**Table S1** Plasmids created in this study

| <b>Plasmid</b> | <b>Relevant characteristics</b>                                                   | <b>Primers</b>                                 |
|----------------|-----------------------------------------------------------------------------------|------------------------------------------------|
| pHAS002        | pRFP144 based shuttle plasmid; expresses Cwp2                                     | NF1304, NF1305                                 |
| pZLS002        | pRFP144 based shuttle plasmid; expresses Cwp66                                    | NF1302, NF1303                                 |
| pSEW002        | Expression of Cwp2 lacking CWB_2 repeat 1                                         | NF1552, NF1553                                 |
| pSEW003        | Expression of Cwp2 lacking CWB_2 repeat 2                                         | NF1554, NF1555                                 |
| pSEW004        | Expression of Cwp2 lacking CWB_2 repeat 3                                         | NF1556, NF1557                                 |
| pSEW005        | Expression of Cwp2 lacking CWB_2 repeat 1 and 2                                   | NF1552, NF1555                                 |
| pSEW006        | Expression of Cwp2 lacking CWB_2 repeat 2 and 3                                   | NF1557, NF1554                                 |
| pSEW007        | Expression of Cwp2 lacking CWB_2 repeat 1, 2 and 3                                | NF1557, NF1554                                 |
| pSEW030        | Expression of Cwp66 lacking CWB_2 repeat 1                                        | NF1756, NF1757                                 |
| pSEW031        | Expression of Cwp66 lacking CWB_2 repeat 2                                        | NF1758, NF1759                                 |
| pSEW032        | Expression of Cwp66 lacking CWB_2 repeat 3                                        | NF1760, NF1761                                 |
| pSEW040        | Expression of Cwp66 lacking CWB_2 repeat 1 and 2                                  | NF1756, NF1759                                 |
| pSEW041        | Expression of Cwp66 lacking CWB_2 repeat 2 and 3                                  | NF1761, NF1758                                 |
| pSEW042        | Expression of Cwp66 lacking CWB_2 repeat 1, 2 and 3                               | NF1756, NF1761                                 |
| pSEW056        | Expression of Cwp66 with PILL residues of CWB_2 repeat 1 mutated to AAAA          | NF2163, NF2164                                 |
| pSEW057        | Expression of Cwp66 with PILL residues of CWB_2 repeat 2 mutated to AAAA          | NF2165, NF2166                                 |
| pSEW058        | Expression of Cwp66 with PILL residues of CWB_2 repeat 3 mutated to AAAA          | NF2167, NF2168                                 |
| pSEW059        | Expression of Cwp66 with PILL residues of CWB_2 repeat 1, 2 and 3 mutated to AAAA | NF2163, NF2164, NF2165, NF2166, NF2167, NF2168 |
| pSEW067        | Expression of Cwp66 with PILL residues of CWB_2 repeat 1 and 2 mutated to AAAA    | NF2163, NF2164, NF2165, NF2166                 |
| pSEW068        | Expression of Cwp66 with PILL residues of CWB_2 repeat 2 and 3 mutated to AAAA    | NF2165, NF2166, NF2167, NF2168                 |
| pSEW069        | Expression of Cwp66 with PILL residues of CWB_2 repeat 1 and 3 mutated to AAAA    | NF2163, NF2164, NF2167, NF2168                 |
| pSEW085        | Expression of Cwp66 with P of CWB_2 repeat 1 mutated to A                         | NF2664, NF2665                                 |

|         |                                                                     |                                                |
|---------|---------------------------------------------------------------------|------------------------------------------------|
| pSEW086 | Expression of Cwp66 with P of CWB_2 repeat 2 mutated to A           | NF2666, NF2667                                 |
| pSEW087 | Expression of Cwp66 with P of CWB_2 repeat 3 mutated to A           | NF2668, NF2669                                 |
| pSEW091 | Expression of Cwp66 with P of CWB_2 repeat 1 and 2 mutated to A     | NF2664, NF2665, NF2666, NF2667                 |
| pSEW092 | Expression of Cwp66 with P of CWB_2 repeat 1 and 3 mutated to A     | NF2664, NF2665, NF2668, NF2669                 |
| pSEW093 | Expression of Cwp66 with P of CWB_2 repeat 2 and 3 mutated to A     | NF2666, NF2667, NF2668, NF2669                 |
| pSEW096 | Expression of Cwp66 with P of CWB_2 repeat 1, 2 and 3 mutated to A  | NF2664, NF2665, NF2666, NF2667, NF2668, NF2669 |
| pSEW079 | Expression of Cwp2 with CWB_2 repeat 2 replaced with CWB_2repeat 1  | NF2541, NF2542                                 |
| pSEW080 | Expression of Cwp2 with CWB_2 repeat 3 replaced with CWB_2 repeat 1 | NF2543, NF2544                                 |
| pSEW081 | Expression of Cwp2 with CWB_2 repeat 1 replaced with CWB_2repeat 2  | NF2545, NF2546                                 |
| pSEW082 | Expression of Cwp2 with CWB_2 repeat 3 replaced with CWB_2repeat 2  | NF2547, NF2548                                 |
| pHAS003 | Retargeted vector for construction of <i>erm::cwp2</i> mutant       |                                                |
| pZLS003 | Retargeted vector for construction of <i>erm::cwp66</i> mutant      |                                                |

**Table S2 Oligonucleotides used in this study**

| <b>Name</b> | <b>Sequence (5' to 3')</b>                  | <b>Description</b>                                                             |
|-------------|---------------------------------------------|--------------------------------------------------------------------------------|
| NF1552      | CAATTTAACCTTTGAATTACCTTCTAATG               | To remove CWB_1 of Cwp2 by inverse PCR                                         |
| NF1553      | CAATTAGAATCAGTAACTAAGAATATTG                | To remove CWB_1 of Cwp2 by inverse PCR                                         |
| NF1554      | AATATTCTTAGTTACTGATTCTAATTGC                | To remove CWB_2 of Cwp2 by inverse PCR                                         |
| NF1555      | CTTGCCGATATTGATAAAGATAGAAAAG                | To remove CWB_2 of Cwp2 by inverse PCR                                         |
| NF1556      | AACTTTTCTATCTTTATCAATATCGGC                 | To remove CWB_3 of Cwp2 by inverse PCR                                         |
| NF1557      | GGAGTTGAATTGACAGTAATACAAAAG                 | To remove CWB_3 of Cwp2 by inverse PCR                                         |
| NF1756      | TGTATCTTTTGTAGATGCATTAGATG                  | To remove CWB_1 of Cwp66 by inverse PCR                                        |
| NF1757      | TTAAATGCAGAAAATATAAATTTTG                   | To remove CWB_1 of Cwp66 by inverse PCR                                        |
| NF1758      | AAAATTTATATTTTCTGCATTTAATTG                 | To remove CWB_2 of Cwp66 by inverse PCR                                        |
| NF1759      | AGTTTACCAAATGCAACAAGAATAGC                  | To remove CWB_2 of Cwp66 by inverse PCR                                        |
| NF1760      | TGCATTTGGTAAACTTCTTTCTACAG                  | To remove CWB_3 of Cwp66 by inverse PCR                                        |
| NF1761      | AATGAAAATGTTGTAGAAGATATAC                   | To remove CWB_3 of Cwp66 by inverse PCR                                        |
| NF2163      | GCTGCTGCTGCTACTCAAAGTAATAAATTGGATAG         | To mutate PILL residues of CWB_2 repeat 1 of Cwp66 to AAAA by inverse PCR      |
| NF2164      | CGCATCTTTTGCTTTAGCAAATGG                    | To mutate PILL residues of CWB_2 repeat 1 of Cwp66 to AAAA by inverse PCR      |
| NF2165      | GCTGCTGCTGCTTCTGATTCAGAGAATGG               | To mutate PILL residues of CWB_2 repeat 2 of Cwp66 to AAAA by inverse PCR      |
| NF2166      | CATGTTTTCTTGAGCAGCTATAGCTCC                 | To mutate PILL residues of CWB_2 repeat 2 of Cwp66 to AAAA by inverse PCR      |
| NF2167      | GCTGCTGCTGCTGCAGGAAATAAGCTTGATAC            | To mutate PILL residues of CWB_2 repeat 3 of Cwp66 to AAAA by inverse PCR      |
| NF2168      | AGAACTATTTTTAGCTGCTAATAC                    | To mutate PILL residues of CWB_2 repeat 3 of Cwp66 to AAAA by inverse PCR      |
| NF2664      | GCTATATTATTAAGTCAAAGTAATAAATTGGATAGTAG      | To mutate P of PILL residues of CWB_2 repeat 1 of Cwp66 to AAAA by inverse PCR |
| NF2665      | CGCATCTTTTGCTTTAGCAAATG                     | To mutate P of PILL residues of CWB_2 repeat 1 of Cwp66 to AAAA by inverse PCR |
| NF2666      | GCTATAATACTTTCTGATTCAGAGAATGGAAC            | To mutate P of PILL residues of CWB_2 repeat 2 of Cwp66 to AAAA by inverse PCR |
| NF2667      | CATGTTTTCTTGAGCAGCTATAGCT                   | To mutate P of PILL residues of CWB_2 repeat 2 of Cwp66 to AAAA by inverse PCR |
| NF2668      | GCTATAGTATTAGCAGGAAATAAGCTTG                | To mutate P of PILL residues of CWB_2 repeat 3 of Cwp66 to AAAA by inverse PCR |
| NF2669      | AGAACTATTTTTAGCTGCTAATACACC                 | To mutate P of PILL residues of CWB_2 repeat 3 of Cwp66 to AAAA by inverse PCR |
| NF2541      | aatcagtaactaagaatattATAGCTGGAGATGATAGATATG  | Replace CWB_2 repeat 2 with CWB_2 repeat 1 in Cwp2 using Gibson's assembly     |
| NF2542      | tttatcaatatcggaagCTTTTTAGCTGTATTTGATACTGC   | Replace CWB_2 repeat 2 with CWB_2 repeat 1 in Cwp2 using Gibson's assembly     |
| NF2543      | ttgataaagatagaaaagttATAGCTGGAGATGATAGATATG  | Replace CWB_2 repeat 3 with CWB_2 repeat 1 in Cwp2 using Gibson's assembly     |
| NF2544      | actgtcaattcaactccCTTTTTAGCTGTATTTGATACTGC   | Replace CWB_2 repeat 3 with CWB_2 repeat 1 in Cwp2 using Gibson's assembly     |
| NF2545      | gtaattcaaaggtaaattGAAAGACTAGCTGGAGATG       | Replace CWB_2 repeat 1 with CWB_2 repeat 2 in Cwp2 using Gibson's assembly     |
| NF2546      | tagttactgattctaattgTTGATTTTCAATTTGGCTAGATAC | Replace CWB_2 repeat 1 with CWB_2 repeat 2 in Cwp2 using Gibson's assembly     |
| NF2547      | ttgataaagatagaaaagttGAAAGACTAGCTGGAGATG     | Replace CWB_2 repeat 3 with CWB_2 repeat 2 in Cwp2 using Gibson's assembly     |
| NF2548      | actgtcaattcaactccTTGATTTTCAATTTGGCTAGATAC   | Replace CWB_2 repeat 3 with CWB_2 repeat 2 in Cwp2 using Gibson's assembly     |

|        |                                             |                                                                                 |
|--------|---------------------------------------------|---------------------------------------------------------------------------------|
| NF2549 | gtaattcaaaggttaaattgCAAAGAGTTGAAGGAGAAAC    | Replace CWB_2 repeat 1 with CWB_2 repeat 2 in Cwp2 using Gibson's assembly      |
| NF2550 | tagttactgattctaattgATTACCTATTTGAGTTACTTCTGC | Replace CWB_2 repeat 1 with CWB_2 repeat 2 in Cwp2 using Gibson's assembly      |
| NF2551 | aatcagtaactaagaatattCAAAGAGTTGAAGGAGAAAC    | Replace CWB_2 repeat2 with CWB_2 repeat 3 in Cwp2 using Gibson's assembly       |
| NF2552 | tttatcaatatcggcaagATTACCTATTTGAGTTACTTCTGC  | Replace CWB_2 repeat2 with CWB_2 repeat 3 in Cwp2 using Gibson's assembly       |
| NF1810 | gatc ggatcc AATTACCTTCAAATTTTAAATTAG        | To amplify DNA from 630 gDNA for antisense RNA knock down of CD630_2780 (BamHI) |
| NF1811 | gatc gagctc CTCTAAATTTTATAAAATC             | To amplify DNA from 630 gDNA for antisense RNA knock down of CD630_2780 (Sacl)  |
| NF1812 | gatc ggatcc GATAATAATACCTATTG               | To amplify DNA from 630 for antisense RNA knock down of CD630_2762 (BamHI)      |
| NF1813 | gatc gagctc CTCTACATAATCTATAAG              | To amplify DNA from 630 for antisense RNA knock down of CD630_2762 (Sacl)       |
| NF1841 | gatc ggatcc AGTTCTACTTTTAGAGTTTAAATTAG      | To amplify DNA from 630 for antisense RNA knock down of CD630_2781 (BamHI)      |
| NF1842 | gatc gagctc CATACTGTCCCATAGAAATTTG          | To amplify DNA from 630 for antisense RNA knock down of CD630_2781 (Sacl)       |
| NF2734 | CTGTAACAAATTGCTCTGTAAATAAAAGAC              | To determine mRNA levels of CD630_2781 by RT PCR                                |
| NF2735 | CTAAAGCAGCATTGTGGATTATG                     | To determine mRNA levels of CD630_2781 by RT PCR                                |
| NF2736 | TGCTTTTATTTGACCTTCTTTGGCTTTAATTC            | To determine mRNA levels of CD630_2762 by RT PCR                                |
| NF2737 | TAGAAGGTGGGCAAGTCAAATGGTATGAC               | To determine mRNA levels of CD630_2762 by RT PCR                                |
| NF2738 | CAAAAATATAAGCCTTTACACCATAAGCAC              | To determine mRNA levels of CD630_2780 by RT PCR                                |
| NF2739 | GAACAAACGAAAAATGAGCTATTAAGTATAAAAG          | To determine mRNA levels of CD630_2780 by RT PCR                                |
| NF408  | TCTTGAATATCAAAGGTGAGCCAGTACA                | To amplify 16 S RNA of C. difficile                                             |
| NF409  | TACAGCGTGGACTACCAGGGTATCTAAT                | To amplify 16 S RNA of C. difficile                                             |
